# Supplementary material
Source: publisher site journal article supplement (https://www.dovepress.com/article/440430)
Supplement: Supplementary file 1 [file get_supplementary_file.php]

**Supplementary Table 1 Baseline characteristics between hepatic steatosis and control groups in different gender groups**

|  | hepatic steatosis | Control | Total |
| --- | --- | --- | --- |
| Male |  |  |  |
| 18~44 | 4436(21.4%) | 6003(29.0%) | 10439(50.4%) |
| 45~59 | 3292(15.9%) | 3292(15.9%) | 6932(33.5%) |
| 60~ | 1167(5.6%) | 2171(10.5%) | 3338(16.1%) |
| Total | 8895(43.0%) | 11814(57.0%) | *P*<0.01 |
| Female |  |  |  |
| 18~44 | 1040(6.3%) | 9082(55.4%) | 10122(61.8%) |
| 45~59 | 907(5.5%) | 3224(19.7%) | 4131(25.2%) |
| 60~ | 757(4.6%) | 1376(8.4%) | 2133(13.0%) |
| Total | 2704(16.5%) | 13682(83.5%) | *P*<0.01 |

Notes: The results were given as a percentage (%), mean±standard deviation and median (interquartile range). Analysis of variance was performed for continuous variables and chi-square tests were performed for categorical variables, respectively.

**Supplementary table 2 OR for liver enzymes(AST, ALT, GGT) in four groups according to SII**

|  | Q1  [0, 269.32] | Q2  [269.33, 360.34] | Q3  [360.35, 482.16] | Q4  [482.18, 4669.56] |
| --- | --- | --- | --- | --- |
| AST | 1 | 1.75(1.62, 1.89) | 3.07(2.86, 3.30) | 6.79(6.32, 7.28) |
| ALT | 1 | 3.37(3.06, 3.73) | 8.41(7.65, 9.24) | 27.40(24.94, 30.11) |
| GGT | 1 | 5.40(4.81, 6.05) | 16.02(14.35, 17.89) | 36.41(32.60, 40.65) |

Abbreviations: OR, odds ratio; AST, glutamate aminotransferase ; ALT, alanine aminotransferase; GGT, Glutamyltransferase.
